# Supplementary material
Source: PubMed Central journal article supplement (PMC1805562)
Supplement: pnas_0611229104_2.pdf [file pnas_0611229104_2.pdf]

**Table 1. Protein binding DNA sequences**

| No.             | ID          | Sequence                     | Prediction | S/N prox | ChIP  |
|-----------------|-------------|------------------------------|------------|----------|-------|
| 1               | stSG598148  | ATCTCCCTGGACTTTGGACCCTCAGC   | 10         | 28.44    | 3.15  |
| 2               | stSG601538  | TGCAAACAGGGCAAAGTCCAAACTAC   | 10         | 26.9     | 2.69  |
| 3*              | stSG601804B | GGAGATGTGGACTTTGCCCCCATGAG   | 10         | 70.01    | 3.45  |
| 4               | stSG602885  | ATAATCCTGGACCTTGGCCCACTTCA   | 10         | 25.1     | 5.75  |
| 5               | stSG607281  | AGGGCTGTGCACCTTGTACTATTTCA   | 10         | 43.1     | 8.36  |
| 6               | stSG603946  | ATTTAGGGGTCCAAAGTGCAGCTGTG   | 10         | 14.02    | 4.01  |
| 7               | stSG609153  | CACTTCCTGAACTTTGCCCTTCCCCTCC | 10         | 44.93    | 2.52  |
| 8               | stSG619706  | TTAAAAAGTGGCAAAGTCCCAATTCA   | 10         | 50.9     | 5.04  |
| 9               | stSG622741  | TCGCGCGGGGTCAAAGTCCATGCAAG   | 10         | 23.75    | 5.64  |
| 10              | stSG630984  | GTGTTTTTGTACTTTGCCCTAAGGATT  | 10         | 25.99    | 3.78  |
| 11              | stSG633449  | TAGACCCTGGACTCTGGATATCTCTC   | 10         | 13.83    | 12.86 |
| 12              | stSG635516  | ACAGAACAGTGCAAAGTTCAACCTGT   | 10         | 17.15    | 2.9   |
| 13              | stSG601777  | AACCCCTTCGCAAAGTCCCAGACCC    | 9          | 10.7     | 2.74  |
| 14              | stSG601795  | AGATCACTTCCCTTTGCCCTAATCAG   | 9          | 11.08    | 5.75  |
| 15*             | stSG601807  | AGGGGTCAGTCCAGAGGTCAGAGTCA   | 9          | -        | 6.68  |
| 16              | stSG622467  | TGGCCCTGTCTCAGAGTCCATGGAGT   | 9          | 16.33    | 4.74  |
| 17              | stSG623016  | GATGTGAAGGACTTTGAGCTTCTTAG   | 9          | 6.28     | 3.4   |
| 18              | stSG601166  | CATGGTAAGGACTTTGACTTTTACT    | 8          | 4.08     | 3.63  |
| 19              | stSG601963  | TGGTGCTTATCAAAGGTCAGCCACT    | 8          | 7.16     | 4.13  |
| 20              | stSG606999  | CAATGTTTTCCAAAGTACAGCTGAG    | 8          | 5.13     | 7.5   |
| 21              | stSG607585  | TTGTCCAGTGCAAAGTACAAATCTCC   | 8          | 5.58     | 2.58  |
| 22              | stSG604432  | AGACTTAGGTACAAGGTGCAATACAA   | 8          | 2.23     | 2.6   |
| 23              | stSG623108  | GTGTTATATGACTCTGACTTCCATGA   | 8          | 3.56     | 6.76  |
| 24              | stSG597766  | TGCAAACAGCCCCCTTGACATGGGTA   | 7          | 3.6      | 12.53 |
| 25              | stSG602142  | TCACAACTGCACCTTGACCAGTTAA    | 7          | 1.84     | 4.43  |
| 26              | stSG603065  | AAAGCTGTGACCCTTGACTTGTGCA    | 7          | 1.64     | 4.16  |
| 27              | stSG607120  | GTAGCCTTGACCTCTGCACACCTTA    | 7          | 5.06     | 2.21  |
| 28*             | stSG621988  | TGGGGCGTGGACTTTGCTCCAGCAGC   | 7          | 4.59     | 4.52  |
| 29              | stSG624412  | ACTGAATACTCAAAGGCCAAGGCTA    | 7          | 4.92     | 3.79  |
| 30 <sup>†</sup> | stSG601804A | GGTCTCTTGTCAAGGTACACCCAAGA   | 6          | 5.31     | 3.45  |
| 31 <sup>†</sup> | stSG601810A | GGCGCTCCTGGCCTCTGCCCGTAAGC   | 6          | 5.39     | 3.86  |
| 32 <sup>†</sup> | stSG601817D | CAAGGCCTGAACCTTGAGCTGGGGAG   | 6          | 4        | 8.17  |
| 33              | stSG607367  | GTATACTTTGACCTTGCACTTTAAAC   | 6          | 2.68     | 3.84  |
| 34              | stSG609102  | GCCCTGTGCCCTCTGCCAGCTGGG     | 6          | 8.94     | 3.14  |
| 35              | stSG616836  | GCCCTCTGGCACTTTGGACAGGCTGG   | 6          | 4.99     | 2.77  |
| 36              | stSG622520  | GGGAGAAGGACCTTGGATTTGGCTT    | 6          | 2.71     | 2.63  |
| 37              | stSG629094  | ATTACCTTATCCAAGGGCAAACCTTT   | 6          | -        | 3.66  |
| 38              | stSG633466  | AGTGGTGTTCAGAGTGCATGCTGTA    | 6          | 1.54     | 6.25  |
| 39              | stSG636542  | GTATTTTATCCAAAGGAAAGAGACAA   | 6          | 5.86     | 11.74 |
| 40              | stSG609339  | GTTGATTTTTCAAAGAGCAGTATAAA   | 5          | 0.77     | 3.26  |
| 41              | stSG620120  | GGGAACTGTGGCACAGGTCACTCTTG   | 5          | 1.73     | 7.4   |
| 42              | stSG622527  | CCCCGGTAGGACTTCGAACTTTCTGA   | 5          | 4.5      | 6.94  |
| 43              | stSG626337  | GGGCATTTGAACTTTGAACTGAAT     | 5          | 3.84     | 8.45  |
| 44              | stSG628176  | ATCTCATGGGACCCTGCAAGGGTTC    | 5          | 8.34     | 4.38  |
| 45              | stSG633115  | ACTAGGAGGCCCTTTGAACGTGGGA    | 5          | 1.45     | 2.76  |
| 46*             | stSG601810B | CAGCAGGTGACCTTTGCCCAGCGCCC   | 4          | 0.55     | 3.86  |
| 47 <sup>†</sup> | stSG601804C | CAGGGTCACAAAAAGTCCAAGAGGCC   | -          | 1.64     | 3.45  |
| 48 <sup>†</sup> | stSG601817A | CCCCCACTGAACCTTTGACCCCTGCC   | -          | 3.58     | 8.17  |
| 49 <sup>†</sup> | stSG601817B | CTTAAGTTCCACATTTGCCAGGACCAG  | -          | 2.07     | 8.17  |
| 50 <sup>†</sup> | stSG601817C | TGCCCACTCTATTTGCCCAGCCCCAG   | -          | -        | 8.17  |

The sequence column shows the variable part of proximity probe sequence. The prediction column shows Bioprospector predictions of the likelihood of HNF-4 $\alpha$  binding. S/N prox indicates the calculated S/N values of proximity ligation. ChIP indicates the fold enrichment of ChIP-chip arrays.

The colored sequences correspond to sites found in gene promoters, where binding sequences have previously been reported. \*, sequences in red are binding sites commonly identified by Rada-Iglesias *et al.* (1 and in other previous studies. †, sequences in green are binding sites identified in this study. ‡, sequences in blue are binding sequences reported in previous studies only. The APOA4 promoter includes the sequences **stSG601804A**, **stSG601804B**, and **stSG601804C**. The APOC3 promoter includes the sequences **stSG601810B** and **stSG601810A**. APOA4/C3 intergenic includes the sequence **stSG601807**. APOA1 promoter includes the sequences **stSG601817A**, **stSG601817B**, **stSG601817C**, and **stSG601817D**. F10 promoter includes the sequence **stSG621988**.

1. Rada-Iglesias A, Wallerman O, Koch C, Ameer A, Enroth S, Clelland G, Wester K, Wilcox S, Dovey OM, Ellis PD, *et al.* (2005) *Hum Mol Genet* 14:3435-3447.
